# Supplementary material
Source: PubMed Central journal article supplement (PMC6571029)
Supplement: NIHMS1031736-supplement-1.pdf [file NIHMS1031736-supplement-1.pdf]

switch (see **D**). For given serum stimulation strength and parameter set, the R-point is reversely correlated to the basal maintenance serum level. (**D**) Simulated serum responses of E2F steady-state affected by parameter changes. All parameter changes in **C** resulted in the same E2F switching threshold ( $Th = 1.6$ , up-pointing black arrow) but different E2F *deactivation* thresholds (shown between the green and red down-pointing arrows in 3 color groups according to the threshold values). For a given parameter set, 1) the activation and deactivation thresholds refer to the lowest serum concentration resulting in the E2F-ON steady state in simulations with the E2F-OFF and -ON initial conditions, respectively; and 2) the serum range between the activation and deactivation thresholds defines the bistable region of the Rb-E2F switch. (**E**) Tipping point of Rb/E2F abundance affected by parameter changes. The amounts of unphosphorylated Rb and free form of E2F were examined in time course simulations: initially, Rb abundance was in excess over E2F ( $Rb/E2F > 1$ ); over time with serum input, the amount of Rb decreased and that of E2F increased; up to a time point (the tipping point),  $Rb/E2F = 1$ , and from then on  $Rb/E2F < 1$ . The simulated tipping point (y-axis) corresponding to increasing parameter values of  $kI$  and  $kR$  is shown (serum input = 10%).

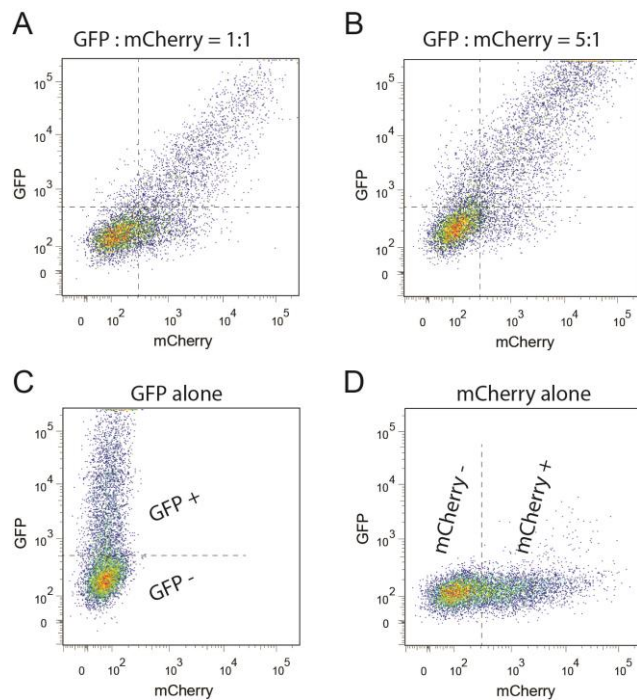

**Figure S2. Linear correlation between levels of co-transfected expression vectors. Related to Figure 5.**

GFP and mCherry expression vectors were co-transfected into REF52 cells using a Neon electroporator. Given a mixing ratio of GFP:mCherry = 1:1, a small but noticeable subset of mCherry+ cells did not exhibit the GFP+ signal (**A**). With a mixing ratio of GFP:mCherry = 5:1, nearly all mCherry+ cells exhibited the GFP+ signal and the GFP fluorescence intensity was linearly correlated with the mCherry fluorescence intensity in individual cells (**B**). Since both GFP and mCherry are stable proteins with similar long half-lives (Corish and Tyler-Smith, 1999; Shaner et al., 2004), the linear correlation between GFP and mCherry signals indicated a linear correlation between the numbers of introduced GFP and mCherry vectors via co-transfection. The ratio of 5:1 was then used in this study for the co-transfection of protein expression vectors and the mCherry vector. Shown in (**C**) and (**D**) are the GFP-only and mCherry-only transfection controls, respectively.

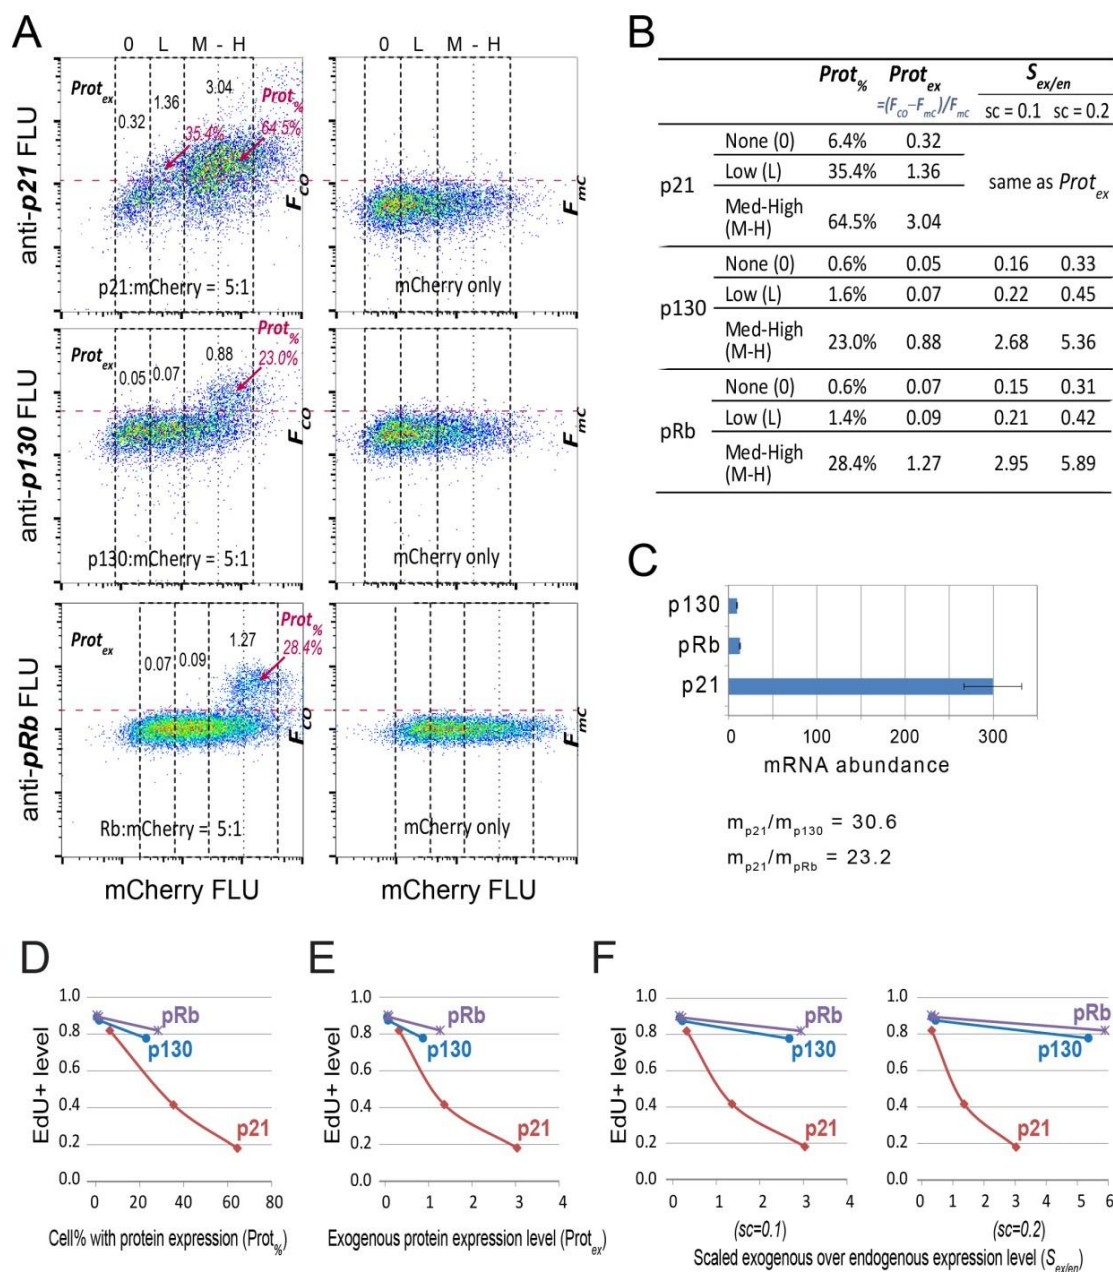

**Figure S3. Correlate p21, p130, and pRb expression vector levels with protein levels. Related to Figure 5.**

(A,B) Measure the correlation between levels of protein expression and introduced expression vector. Expression vectors of p21, p130, and pRb were co-transfected with the mCherry vector (5:1 ratio) as in Figure 5A. Cells were induced to quiescence by serum starvation and then subject to immunoflow cytometry with protein-specific antibodies (see Methods). Y-axis = antibody-specific fluorescence intensity (FLU). X-axis = mCherry intensity. 0, L, M, H = cell bins of non-transfected, and with low, medium, and high levels of the mCherry vector, respectively, as in Figure 5A.  $Prot_{\%}$  corresponds to the percentage of cells in each bin with positive ectopic protein expression (with antibody-specific FLU over the mCherry-only control).  $Prot_{ex} = (F_{CO} - F_{mC}) / F_{mC}$  represents the FLU fold-increase over background due to introduced expression vector, with  $F_{CO}$  and  $F_{mC}$  being the mean antibody-fluorescence intensities in the samples of co-transfection and mCherry-only transfection control, respectively.  $F_{mC}$  represents the combination of endogenous protein staining and non-specific background staining (the major source of  $F_{mC}$ , as seen from the similarly high fluorescence intensity with anti-FLAG antibody (no endogenous staining) in Figure S5). (B) Estimate protein level increase due to exogenous expression.  $S_{ex/en} = Prot_{ex} / L_{en}$  ( $L_{en}$ , relative endogenous protein level)

represents the scaled exogenous protein level normalized by endogenous expression. The fold difference of two endogenous protein levels was converted from the fold difference of their mRNA abundance (measured in **C**) by a given scaling factor ( $sc = 0.1$  or  $0.2$ ; e.g., when  $L_{en}$  of p21 was set to 1,  $L_{en}$  of pRb =  $1/(sc * m_{p21}/m_{pRb})$ ). **(C)** mRNA abundance. The transcript abundance (x-axis) of endogenous p21, pRb, and p130 was quantified from RNA-seq analysis of 2D-STA cells and consistent with qRT-PCR results (Fujimaki, Bai, and Yao, unpublished). The fold differences of mRNA abundance are shown at the bottom. **(D-F)** Convert expression vector levels to relative exogenous protein levels. The conversion was based on **B**, using  $Prot_{\%}$  (**D**, same as Figure 5C),  $Prot_{ex}$  (**E**), and  $S_{ex/en}$  with  $sc=0.1$  (**F**, left; same as Figure 5D) and  $sc=0.2$  (**F**, right), respectively. X-axis = correspondingly converted units (left to right data points: 0, L, M-H). Y-axis = EdU+ cell proportion as determined in Figure 5B. Different assumed  $sc$  values did not affect the qualitative feature of the results, as seen in **F**.

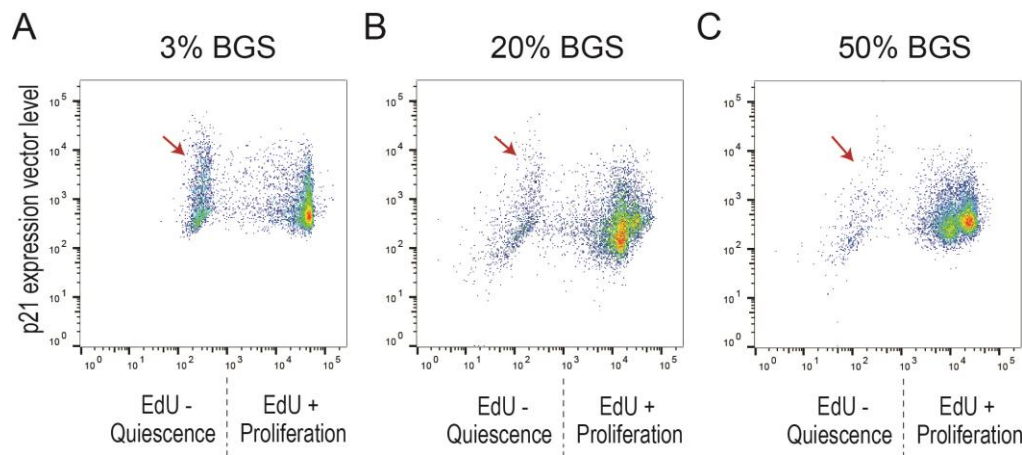

**Figure S4. High ectopic p21 expression leads to deep quiescence but not senescence. Related to Figure 5.** Quiescent cells (2D-STA) with transfected p21 were switched to medium containing serum at indicated concentrations and EdU at time 0. Cells were harvested 48 hours later for EdU incorporation assay. Y-axis = levels of introduced p21 expression vector in individual cells (as in Figure 5A). X-axis = EdU-incorporation intensity. Red arrow indicates non-proliferative (EdU-) cells with high p21 expression; this subpopulation of cells diminished with serum stimulation at high concentrations (20% and 50% vs. 3%), indicating that those cells were not senescent but in deep quiescence.

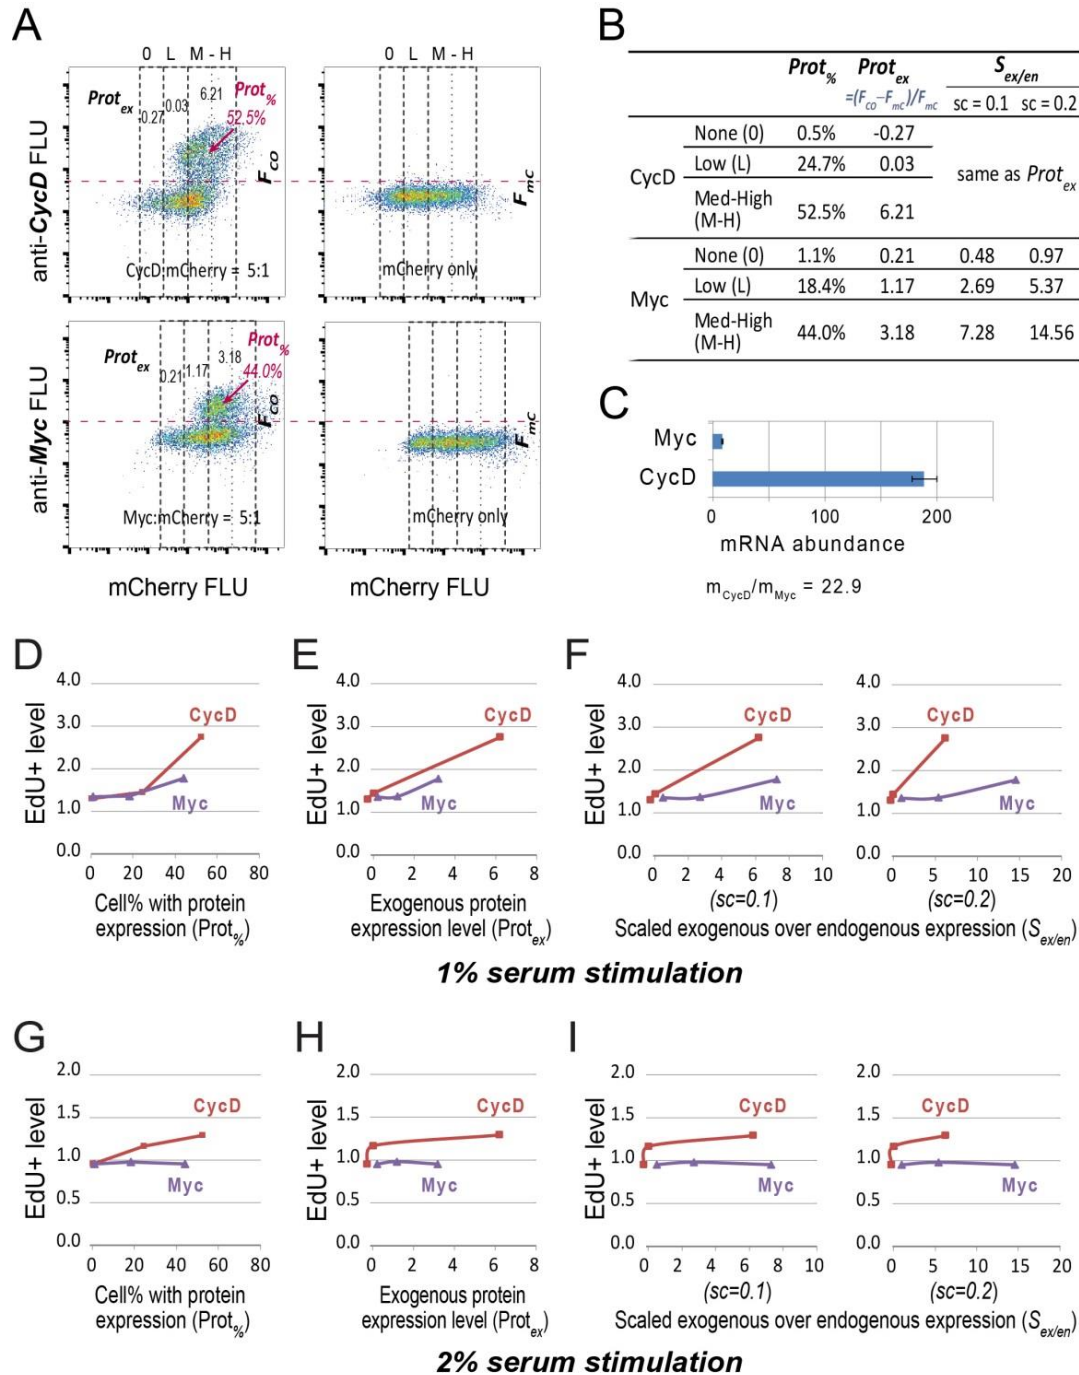

**Figure S5. Correlate CycD and Myc expression vector levels with protein levels. Related to Figure 6.**  
**(A,B)** Measure the correlation between levels of protein expression and introduced expression vector. Expression vectors of CycD and Myc were co-transfected with the mCherry vector (5:1 ratio) as in Figure 6A. Cells were induced to quiescence by serum starvation and then subject to immunoflow cytometry with protein-specific antibodies (see Methods). Y-axis = antibody-specific fluorescence intensity (FLU). X-axis = mCherry intensity. 0, L, M, H = non-transfected, with low, medium, and high levels of the mCherry vector, respectively, as in Figure 6A.  $Prot_{\%}$ ,  $Prot_{ex}$ ,  $F_{CO}$ , and  $F_{MC}$  are as defined in Figure S3A. **(B)** Estimate protein level increase due to exogenous expression. The scaled exogenous over endogenous expression  $S_{ex/en}$  and scaling factor  $sc$  are as defined in Figure S3B. **(C)** mRNA abundance. The transcript abundance (x-axis) of endogenous Myc and CycD1 was quantified from RNA-seq analysis of 2D-STA cells and consistent with qRT-PCR results (Fujimaki, Bai, and Yao, unpublished).

The fold difference in the mRNA abundance of CycD1 and Myc (shown at the bottom) was converted to the fold difference in their protein abundance (as in Figure S3B) by a given degree ( $sc = 0.1$  or  $0.2$  in **B**). Different assumed  $sc$  values did not affect the qualitative feature of the results (as seen in **F** and **I**). (**D-I**) Convert expression vector levels to relative exogenous protein levels. The conversion was based on **B**, using  $Prot\%$  (**D,G**),  $Prot_{ex}$  (**E,H**), and  $S_{ex/en}$  with  $sc=0.1$  (**F,I**, left; same as Figure 6C) and  $sc=0.2$  (**F,I**, right), respectively. X-axis = correspondingly converted units (left to right data points: 0, L, M-H). Y-axis = EdU+ cell proportion as determined in Figure 6B.

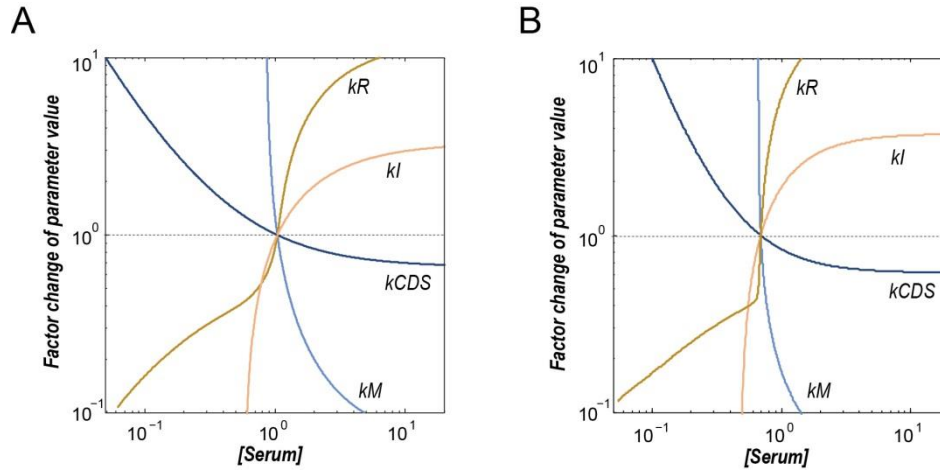

**Figure S6. Two-parameter bifurcation diagram. Related to Model Simulations in Experimental Procedures.** (**A**) The curves trace out the locations of the saddle-node bifurcation point (in terms of the serum concentration  $[S]$  at which the system switches from E2F-OFF to E2F-ON, x-axis) of the Rb-E2F bistable model (Table S1), as a function of a given value of the four experimentally tested parameters  $kl$ ,  $kR$ ,  $kCDS$ , and  $kM$ , respectively. Y-axis = factor change of a parameter from its base value (Table S2). (**B**) Same as **A**, except that cooperativity (Hill coefficient = 1.5) was introduced in each Hill function term of the model in **A** and that a small basal synthesis rate  $k_{E0} = 0.02$  nM/hr was added to the E2F synthesis term so that the simulated E2F activation dynamics (after all Hill coefficients were increased from 1 to 1.5) was similar to that in the model in **A**.

**Table S1. The Rb-E2F switch model. Related to Model Simulations in Experimental Procedures** (adapted from (Yao et al., 2008), with additions marked with \*\*).

|                                                                                                                                                                                                                                |
|--------------------------------------------------------------------------------------------------------------------------------------------------------------------------------------------------------------------------------|
| $\frac{d[M]}{dt} = \frac{k_M[S]}{K_S + [S]} - d_M[M]$                                                                                                                                                                          |
| $\frac{d[E]}{dt} = k_E \left( \frac{[M]}{K_M + [M]} \right) \left( \frac{[E]}{K_E + [E]} \right) + \frac{k_b[M]}{K_M + [M]} + \frac{k'_P[CD][RE]}{K_{CD} + [RE]} + \frac{k'_P[CE][RE]}{K_{CE} + [RE]} - d_E[E] - k_{RE}[R][E]$ |
| $\frac{d[CD]}{dt} = \frac{k_{CD}[M]}{K_M + [M]} + \frac{k_{CDS}[S]}{K_S + [S]} - d_{CD}[CD]$                                                                                                                                   |
| $\frac{d[CE]}{dt} = \frac{k_{CE}[E]}{K_E + [E]} - d_{CE}[CE]$                                                                                                                                                                  |
| $\frac{d[R]}{dt} = k_R + \frac{k_{DP}[RP]}{K_{RP} + [RP]} - k_{RE}[R][E] - \frac{k'_P[CD][R]}{K_{CD} + [R]} - \frac{k'_P[CE][R]}{K_{CE} + [R]} - d_R[R]$                                                                       |
| $\frac{d[RP]}{dt} = \frac{k'_P[CD][R]}{K_{CD} + [R]} + \frac{k'_P[CE][R]}{K_{CE} + [R]} + \frac{k'_P[CD][RE]}{K_{CD} + [RE]} + \frac{k'_P[CE][RE]}{K_{CE} + [RE]} - \frac{k_{DP}[RP]}{K_{RP} + [RP]} - d_{RP}[RP]$             |
| $\frac{d[RE]}{dt} = k_{RE}[R][E] - \frac{k'_P[CD][RE]}{K_{CD} + [RE]} - \frac{k'_P[CE][RE]}{K_{CE} + [RE]} - d_{RE}[RE]$                                                                                                       |
| $** \frac{d[I]}{dt} = k_I - d_I[I]$                                                                                                                                                                                            |
| $** \left( k'_P = \frac{k_P}{K_p + [I]} \right)$                                                                                                                                                                               |

*Model variables:*

S: serum concentration

M: Myc

E: E2F

CD: Cyclin D/Cdk4,6

CE: Cyclin E/Cdk2

R: Rb family proteins

RP: Phosphorylated Rb

RE: Rb-E2F complex

I: Cdk inhibitors

*Initial conditions:*

[M] = [E] = [CD] = [CE] = [R] = [RP] = 0 nM; [RE] = 0.55 nM; \*\* [I] = 0.5 nM.

*Model parameters:*

[See Table S2]

**Table S2. Model parameters. Related to Model Simulations in Experimental Procedures** (adapted from (Yao et al., 2008), with additions marked with \*\*).

| Symbol     | Values            | Description                                                              |
|------------|-------------------|--------------------------------------------------------------------------|
| $k_M$      | 1.0 nM/hr         | Rate constant of Myc synthesis driven by growth factors                  |
| $k_E$      | 0.4 nM/hr         | Rate constant of E2F synthesis driven by Myc and E2F                     |
| $k_b$      | 0.003 nM/hr       | Rate constant of E2F synthesis driven by Myc alone                       |
| $k_{CD}$   | 0.03 nM/hr        | Rate constant of CycD synthesis driven by Myc                            |
| $k_{CDS}$  | 0.45 nM/hr        | Rate constant of CycD synthesis driven by growth factors                 |
| $k_{CE}$   | 0.35 nM/hr        | Rate constant of CycE synthesis driven by E2F                            |
| $k_R$      | 0.18 nM/hr        | Rate constant of Rb constitutive synthesis                               |
| $k_I^{**}$ | 0.15 nM/hr        | Rate constant of Cdk inhibitor synthesis                                 |
| $k_{DP}$   | 3.6 nM/hr         | Dephosphorylation rate constant of Rb by phosphatases                    |
| $k_{RE}$   | 180 nM/hr         | Association rate constant of Rb and E2F                                  |
| $K_S$      | 0.5 nM            | Michaelis-Menten parameter for CycD and Myc synthesis by growth factors  |
| $K_E$      | 0.15 nM           | Michaelis-Menten parameter for CycE and E2F synthesis by E2F             |
| $K_M$      | 0.15 nM           | Michaelis-Menten parameter for CycD and E2F synthesis by Myc             |
| $K_{RP}$   | 0.01 nM           | Michaelis-Menten parameter for Rb dephosphorylation                      |
| $K_{CD}$   | 0.92 nM           | Michaelis-Menten parameter for Rb phosphorylation by CycD/Cdk4,6         |
| $K_{CE}$   | 0.92 nM           | Michaelis-Menten parameter for Rb phosphorylation by CycE/Cdk2           |
| $d_M$      | 0.7/hr            | Degradation rate constant of Myc                                         |
| $d_E$      | 0.25/hr           | Degradation rate constant of E2F                                         |
| $d_{CD}$   | 1.5/hr            | Degradation rate constant of CycD                                        |
| $d_{CE}^*$ | 1.5/hr            | Degradation rate constant of CycE                                        |
| $d_R$      | 0.06/hr           | Degradation rate constant of Rb                                          |
| $d_{RP}$   | 0.06/hr           | Degradation rate constant of phosphorylated Rb                           |
| $d_{RE}$   | 0.03/hr           | Degradation rate constant of Rb-E2F complex                              |
| $d_I^{**}$ | 0.3/hr            | Degradation rate constant of Cdk inhibitor p21 (Schönthal, 2004)         |
| $k_P^{**}$ | 45/hr             | Phosphorylation rate constant of CycD/Cdk4,6 and CycE/Cdk2 (Cdks)        |
| $K_P^{**}$ | 2 nM              | Michaelis-Menten parameter for Cdk activities affected by Cdk inhibitors |
| $k'_P$     | $k_p/(K_p + [I])$ | Effective phosphorylation rate constant of CycD/Cdk4,6 and CycE/Cdk2     |

\*\* The values of the four new parameters were adjusted together so that  $k'_p = 18/\text{hr}$  as in (Yao et al., 2008) (with the initial condition  $[I] = 0.5 \text{ nM}$ ) and that the simulated E2F activation dynamics is the same as that in (Yao et al., 2008) for a given serum input.

\* $d_{CE} = 3/\text{hr}$  in constructing a quasi-potential landscape from the SDE version of the Rb-E2F switch model (see Methods), to facilitate the system converging at a steady-state distribution of E2F molecule number.



**Table S3. Minimum serum duration\* required to turn ON the Rb-E2F switch. Related to Figure 4A.**

| Activation threshold (Th) | Parameter changed | Factor change of parameter | Model time (Hr) | Minimum serum pulse (Hr) |            |
|---------------------------|-------------------|----------------------------|-----------------|--------------------------|------------|
|                           |                   |                            |                 | 40% E2F-ON               | 50% E2F-ON |
| 0.8                       | Base (no change)  | 1.0 (no change)            | 24              | 3.0                      | 3.1        |
|                           |                   |                            | 48              | 3.0                      | 3.1        |
|                           |                   |                            | 108             | 3.0                      | 3.1        |
| 1.6                       | <i>dI</i>         | 0.43                       | 24              | 8.2                      | 10.3       |
|                           |                   |                            | 48              | 8.2                      | 9.2        |
|                           |                   |                            | 108             | 8.2                      | 9.2        |
|                           | <i>kCDS</i>       | 0.79                       | 24              | 7.2                      | 7.5        |
|                           |                   |                            | 48              | 7.2                      | 7.5        |
|                           |                   |                            | 108             | 7.2                      | 7.5        |
|                           | <i>kP</i>         | 0.82                       | 24              | 12.0                     | 13.3       |
|                           |                   |                            | 48              | 11.5                     | 12.1       |
|                           |                   |                            | 108             | 11.5                     | 12.1       |
|                           | <i>dCD</i>        | 1.25                       | 24              | 6.9                      | 7.0        |
|                           |                   |                            | 48              | 6.9                      | 7.0        |
|                           |                   |                            | 108             | 6.9                      | 7.0        |
|                           | <i>KP</i>         | 1.28                       | 24              | 12.0                     | 13.9       |
|                           |                   |                            | 48              | 11.1                     | 12.1       |
|                           |                   |                            | 108             | 11.1                     | 12.1       |
|                           | <i>KCD</i>        | 1.45                       | 24              | 7.1                      | 8.0        |
|                           |                   |                            | 48              | 7.1                      | 8.0        |
|                           |                   |                            | 108             | 7.1                      | 8.0        |
|                           | <i>KE</i>         | 1.89                       | 24              | 20.0                     | 20.3       |
|                           |                   |                            | 48              | 15.9                     | 16.9       |
|                           |                   |                            | 108             | 15.9                     | 16.9       |
|                           | <i>kI</i>         | 2.04                       | 24              | 10.0                     | 12.5       |
|                           |                   |                            | 48              | 9.9                      | 11.0       |
|                           |                   |                            | 108             | 9.9                      | 11.0       |
|                           | <i>kRE</i>        | 2.15                       | 24              | 7.1                      | 7.7        |
|                           |                   |                            | 48              | 7.1                      | 7.7        |
|                           |                   |                            | 108             | 7.1                      | 7.7        |
|                           | <i>dRE</i>        | 2.18                       | 24              | 4.9                      | 5.0        |
|                           |                   |                            | 48              | 4.9                      | 5.0        |
|                           |                   |                            | 108             | 4.9                      | 5.0        |
|                           | <i>KS</i>         | 2.77                       | 24              | 7.0                      | 7.9        |
|                           |                   |                            | 48              | 7.0                      | 7.9        |
|                           |                   |                            | 108             | 7.0                      | 7.9        |
|                           | <i>kR</i>         | 5.53                       | 24              | 20.3                     | 21.1       |
|                           |                   |                            | 48              | 16.1                     | 17.1       |
|                           |                   |                            | 108             | 16.1                     | 17.1       |

\*Serum pulse was applied as in Figure 4A. The minimum serum-pulse duration required to turn ON the Rb-E2F switch in a given percentage (40% or 50%) of cells at the indicated model hours was calculated for each parameter change from 500 stochastic simulations of the Rb-E2F bistable model (Table S1).

**Table S4. Source data related to Figure 5B.**

| # | mC  | EdU- (c.c.)       | EdU+ (c.c.)          | EdU+%       | # | p21  | EdU- (c.c.)       | EdU+ (c.c.)          | EdU+%       | (c.c., cell count) |
|---|-----|-------------------|----------------------|-------------|---|------|-------------------|----------------------|-------------|--------------------|
| 1 | 0   | 1045              | 5250                 | 83.4        | 1 | 0    | 1144              | 2874                 | 71.5        |                    |
|   | L   | 754               | 3333                 | 81.6        |   | L    | 2033              | 1148                 | 36.1        |                    |
|   | M+H | 554               | 1502                 | 73.1        |   | M+H  | 1777              | 382                  | 17.7        |                    |
| 2 | 0   | 757               | 5365                 | 87.6        | 2 | 0    | 1757              | 3839                 | 68.6        |                    |
|   | L   | 628               | 3386                 | 84.4        |   | L    | 2597              | 1547                 | 37.3        |                    |
|   | M+H | 459               | 1377                 | 75.0        |   | M+H  | 2082              | 423                  | 16.9        |                    |
| 3 | 0   | 781               | 6100                 | 88.6        | 3 | 0    | 1225              | 2839                 | 69.9        |                    |
|   | L   | 668               | 3600                 | 84.3        |   | L    | 1979              | 1230                 | 38.3        |                    |
|   | M+H | 453               | 1479                 | 76.6        |   | M+H  | 1819              | 409                  | 18.4        |                    |
| 4 | 0   | 2293              | 4398                 | 65.7        | 4 | 0    | 2439              | 2787                 | 53.3        |                    |
|   | L   | 1372              | 2789                 | 67.0        |   | L    | 3313              | 1291                 | 28.0        |                    |
|   | M+H | 883               | 1683                 | 65.6        |   | M+H  | 3734              | 313                  | 7.7         |                    |
| 5 | 0   | 1967              | 5124                 | 72.3        | 5 | 0    | 1477              | 2219                 | 60.0        |                    |
|   | L   | 1110              | 2676                 | 70.7        |   | L    | 2835              | 1012                 | 26.3        |                    |
|   | M+H | 1063              | 2131                 | 66.7        |   | M+H  | 5125              | 432                  | 7.8         |                    |
| 6 | 0   | 1928              | 5444                 | 73.8        | 6 | 0    | 1676              | 2827                 | 62.8        |                    |
|   | L   | 914               | 2719                 | 74.8        |   | L    | 3868              | 1387                 | 26.4        |                    |
|   | M+H | 1018              | 2345                 | 69.7        |   | M+H  | 7222              | 665                  | 8.4         |                    |
|   |     | <i>s.e.m. (%)</i> | <i>normalized(%)</i> | avg (EdU+%) |   |      | <i>s.e.m. (%)</i> | <i>normalized(%)</i> | avg (EdU+%) |                    |
|   | 0   | 6.8               | 100.0                | 78.6        |   | 0    | 5.4               | 81.9                 | 64.4        |                    |
|   | L   | 5.5               | 100.0                | 77.1        |   | L    | 3.4               | 41.6                 | 32.1        |                    |
|   | M+H | 3.6               | 100.0                | 71.1        |   | M+H  | 3.1               | 18.0                 | 12.8        |                    |
| # | Rb  | EdU- (c.c.)       | EdU+ (c.c.)          | EdU+%       | # | p130 | EdU- (c.c.)       | EdU+ (c.c.)          | EdU+%       |                    |
| 1 | 0   | 2018              | 5306                 | 72.4        | 1 | 0    | 2243              | 4738                 | 67.9        |                    |
|   | L   | 1434              | 3025                 | 67.8        |   | L    | 1647              | 3046                 | 64.9        |                    |
|   | M+H | 981               | 1134                 | 53.6        |   | M+H  | 1147              | 1193                 | 51.0        |                    |
| 2 | 0   | 1816              | 5735                 | 76.0        | 2 | 0    | 1898              | 4532                 | 70.5        |                    |
|   | L   | 1280              | 3157                 | 71.2        |   | L    | 1286              | 2494                 | 66.0        |                    |
|   | M+H | 797               | 1116                 | 58.3        |   | M+H  | 906               | 886                  | 49.4        |                    |
| 3 | 0   | 2065              | 5463                 | 72.6        | 3 | 0    | 2114              | 5206                 | 71.1        |                    |
|   | L   | 1477              | 3101                 | 67.7        |   | L    | 1405              | 3032                 | 68.3        |                    |
|   | M+H | 1010              | 1220                 | 54.7        |   | M+H  | 1181              | 1245                 | 51.3        |                    |
| 4 | 0   | 3152              | 2920                 | 48.1        | 4 | 0    | 2899              | 3057                 | 51.3        |                    |
|   | L   | 1954              | 2112                 | 51.9        |   | L    | 2696              | 2898                 | 51.8        |                    |
|   | M+H | 828               | 594                  | 41.8        |   | M+H  | 1462              | 1193                 | 44.9        |                    |
| 5 | 0   | 1322              | 4693                 | 78.0        | 5 | 0    | 911               | 3681                 | 80.2        |                    |
|   | L   | 723               | 2475                 | 77.4        |   | L    | 663               | 2231                 | 77.1        |                    |
|   | M+H | 1103              | 2823                 | 71.9        |   | M+H  | 1244              | 2506                 | 66.8        |                    |
| 6 | 0   | 1548              | 5721                 | 78.7        | 6 | 0    | 1131              | 4480                 | 79.8        |                    |
|   | L   | 972               | 3306                 | 77.3        |   | L    | 825               | 2725                 | 76.8        |                    |
|   | M+H | 1416              | 3194                 | 69.3        |   | M+H  | 1497              | 3174                 | 68.0        |                    |
|   |     | <i>s.e.m. (%)</i> | <i>normalized(%)</i> | avg (EdU+%) |   |      | <i>s.e.m. (%)</i> | <i>normalized(%)</i> | avg (EdU+%) |                    |
|   | 0   | 7.4               | 90.3                 | 71.0        |   | 0    | 7.0               | 89.2                 | 70.1        |                    |
|   | L   | 6.1               | 89.3                 | 68.9        |   | L    | 6.0               | 87.5                 | 67.5        |                    |
|   | M+H | 6.7               | 81.9                 | 58.3        |   | M+H  | 5.9               | 77.7                 | 55.2        |                    |

## **Supplemental References**

Corish, P., and Tyler-Smith, C. (1999). Attenuation of green fluorescent protein half-life in mammalian cells. *Protein Eng* 12, 1035-1040.

Schönthal, A. H. (2004). Checkpoint controls and cancer, (Totowa, N.J.: Humana Press).

Shaner, N. C., Campbell, R. E., Steinbach, P. A., Giepmans, B. N., Palmer, A. E., and Tsien, R. Y. (2004). Improved monomeric red, orange and yellow fluorescent proteins derived from *Discosoma* sp. red fluorescent protein. *Nat Biotechnol* 22, 1567-1572.
